# Supplementary material for: Anisotropic microparticles for differential drug release in nerve block anesthesia
Source: Royal Society of Chemistry journal article supplement (doi:10.1039/d0ra08386k), 2021-01-01
Supplement: d0ra08386k1.pdf [file d0ra08386k1.pdf]

## Anisotropic Microparticles for Differential Drug Release in Nerve Block Anesthesia

Shivakumar B.S<sup>a</sup>, Vignesh Gopalakrishnan-Prema<sup>a</sup>, Gayathri Raju<sup>a</sup>, Sumi E Mathew<sup>a</sup>, Neeraj Katiyar<sup>a</sup>, Deepthy Menon<sup>a</sup>, Sahadev A Shankarappa<sup>a\*</sup>

### SUPPLEMENTARY FIGURES

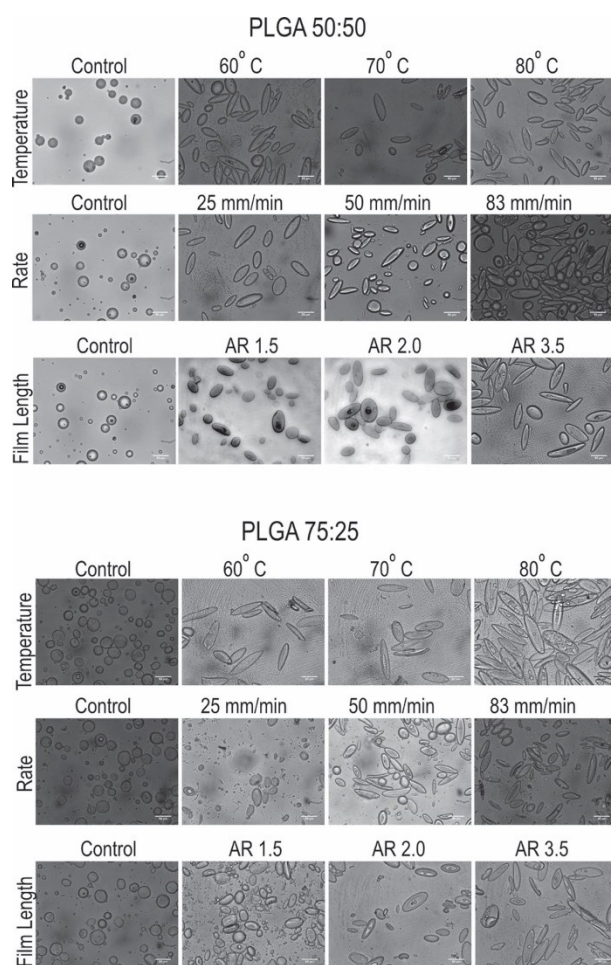

**Figure S1.** Representative bright field images of drug-free microparticles extracted from PVA films that were exposed to varying temperature, stretching rate, and stretch-length

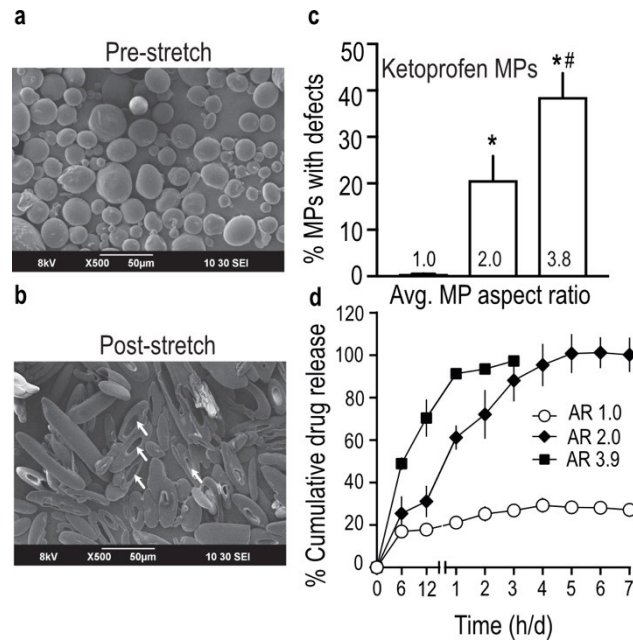

**Figure S2. MPs loaded with an unrelated drug (ketoprofen) and its release profile.** Representative SEM images of blank, or ketoprofen loaded spherical microparticles (a) sized  $20.3 \pm 6.4 \mu\text{m}$ , that were subjected to a controlled stretching force, resulting in oblong and ellipsoid shaped microparticles (b). Stretched ketoprofen loaded microparticles showed large central defects (arrow). Number of visible defects from ketoprofen microparticles were counted from 4-6 images (ca 150-200 microparticles per image) and plotted on a bar graph, where AR indicates the aspect ratio of the stretched microparticles (c). Data shown are mean  $\pm$  SD, \*, #  $P < 0.05$ , where \* indicates statistical comparison between the indicated and non-stretched group (AR 1.0), while # indicates comparison between the indicated and AR 2.0 groups. Percent cumulative drug release from ketoprofen loaded microparticles of varying aspect ratio (d). Data shown are mean  $\pm$  SD from 2-3 separate experiments conducted in triplicates.
